# Supplementary material for: Insulin enhances metabolic capacities of cancer cells by dual regulation of glycolytic enzyme pyruvate kinase M2
Source: PubMed Central journal article supplement (PMC3710280; doi:10.1186/1476-4598-12-72), 2013-07-09
Supplement: 1476-4598-12-72-S1.pdf [file 1476-4598-12-72-S1.pdf]

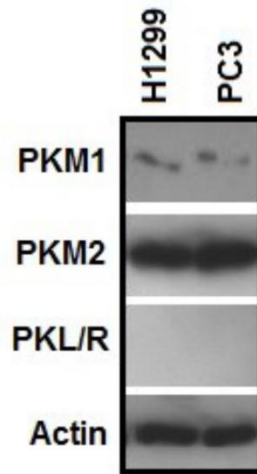

**Fig S1.** PKM2 is the predominant isoform in H1299 and PC3 cell. PKM1 expression is negligibly low.
