# Supplementary material for: Insulin enhances metabolic capacities of cancer cells by dual regulation of glycolytic enzyme pyruvate kinase M2
Source: PubMed Central journal article supplement (PMC3710280; doi:10.1186/1476-4598-12-72), 2013-07-09
Supplement: 1476-4598-12-72-S5.pdf [file 1476-4598-12-72-S5.pdf]

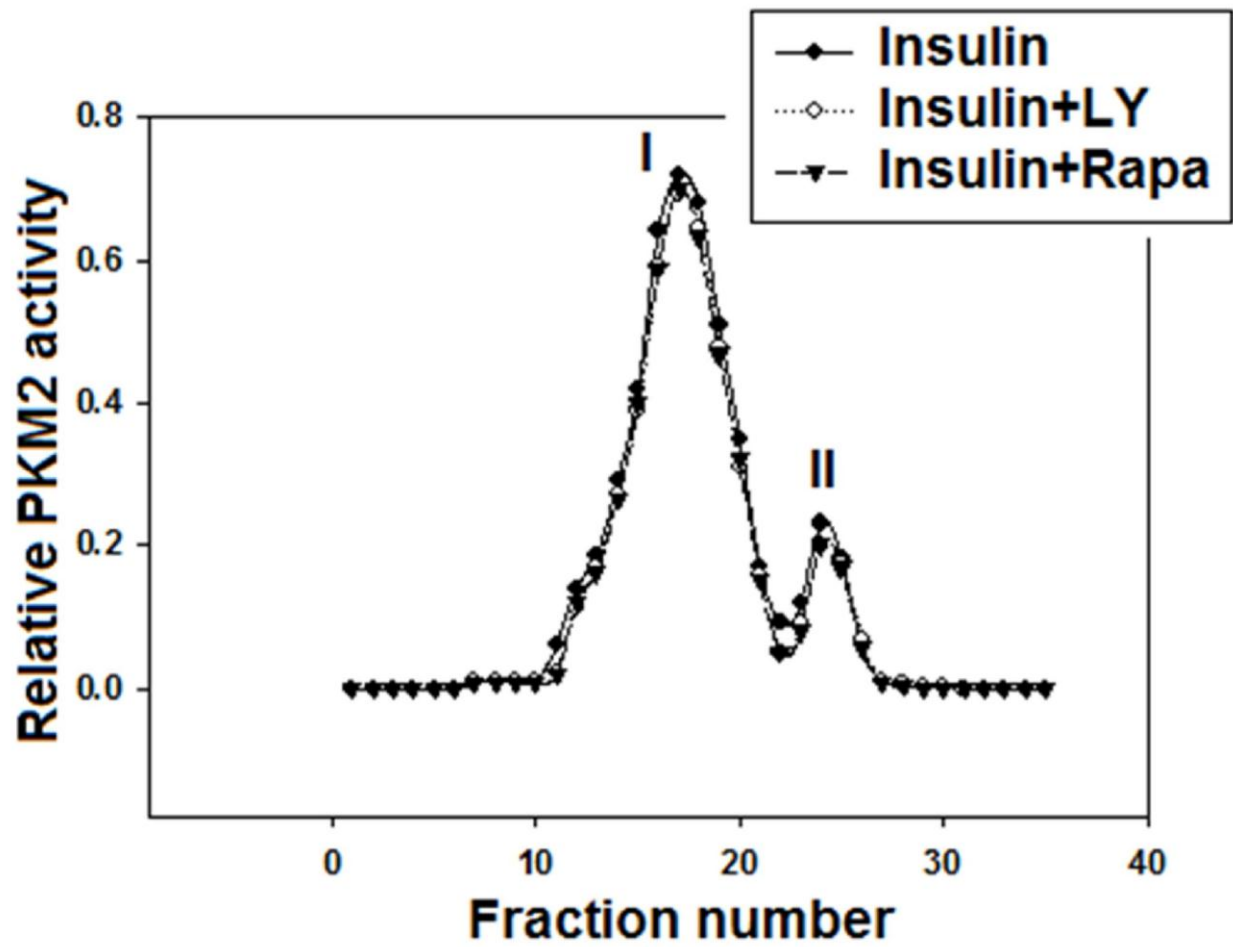

**Fig. S5** Glycerol gradient of cells pre-treated with DMSO or 50  $\mu$ M LY294002 or 20 nM rapamycin, followed by 100 nM insulin treatment for 15 minutes.
