# Supplementary material for: Insulin enhances metabolic capacities of cancer cells by dual regulation of glycolytic enzyme pyruvate kinase M2
Source: PubMed Central journal article supplement (PMC3710280; doi:10.1186/1476-4598-12-72), 2013-07-09
Supplement: 1476-4598-12-72-S8.pdf [file 1476-4598-12-72-S8.pdf]

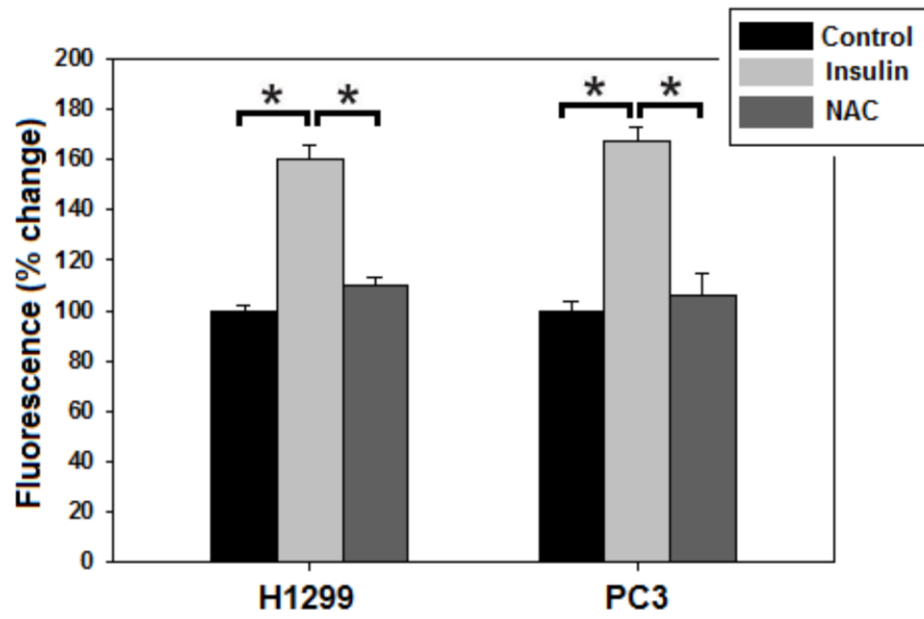

**Fig S8.** Insulin treatment increase ROS in H1299 and PC3 cells. Pretreatment with 5 mM NAC decreased insulin-induced ROS. Data is expressed as mean  $\pm$ SE. \* $P \leq 0.05$ .
