# Supplementary material for: Insulin enhances metabolic capacities of cancer cells by dual regulation of glycolytic enzyme pyruvate kinase M2
Source: Mol Cancer. 2013 Jul 9;12:72. doi: 10.1186/1476-4598-12-72 (PMC3710280; doi:10.1186/1476-4598-12-72)
Supplement: Additional file 6: Figure S6 — Representative Western blot showing no change in phosphor-tyr-105-PKM2 upon insulin treatment (100 nM for 15 minutes) and inhibition with 50 μM LY294002 and 20 nM rapamycin, in HepG2 cells. [file 1476-4598-12-72-S6.pdf]

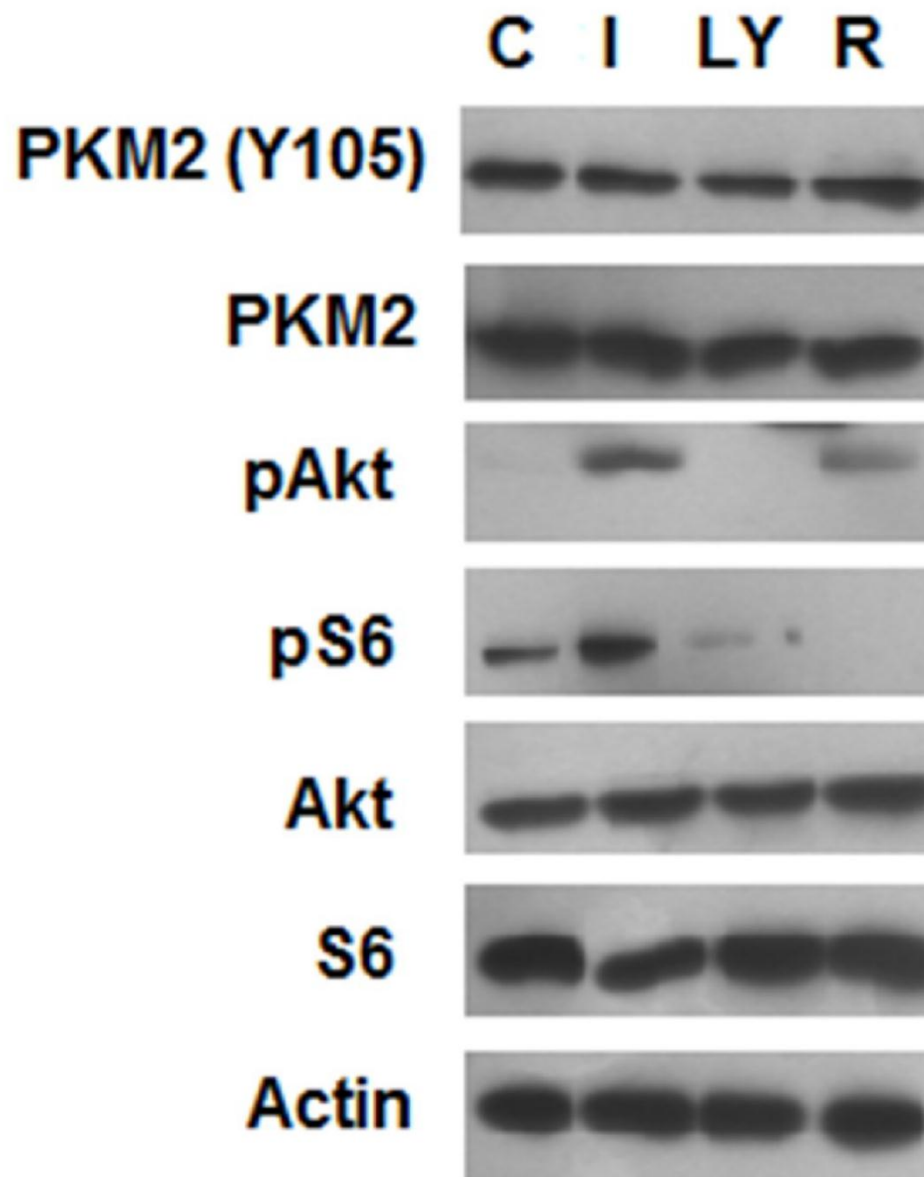

**Fig S6.** Representative Western blot showing no change in phosphor-tyr-105-PKM2 upon insulin treatment (100 nM for 15 minutes) and inhibition with 50  $\mu$ M LY294002 and 20 nM Rapamycin, in HepG2 cells.
